# Supplementary material for: Immune-mediated inflammatory diseases after anti-SARS-CoV-2 vaccines: new diagnoses and disease flares
Source: PubMed Central journal article supplement — RMD Open. 2022 Sep 7;8(2):e002460. doi: 10.1136/rmdopen-2022-002460 (PMC9453424; doi:10.1136/rmdopen-2022-002460), 2022-09-07
Supplement: rmdopen-2022-002460supp001.pdf [file rmdopen-2022-002460supp001.pdf]

## SUPPLEMENTARY MATERIAL

**Supplementary Figure S1** Flow chart of patient distribution also incorporating the WHO algorithm for identification of patients with of adverse events following immunization. IMID, immune mediated inflammatory disease.

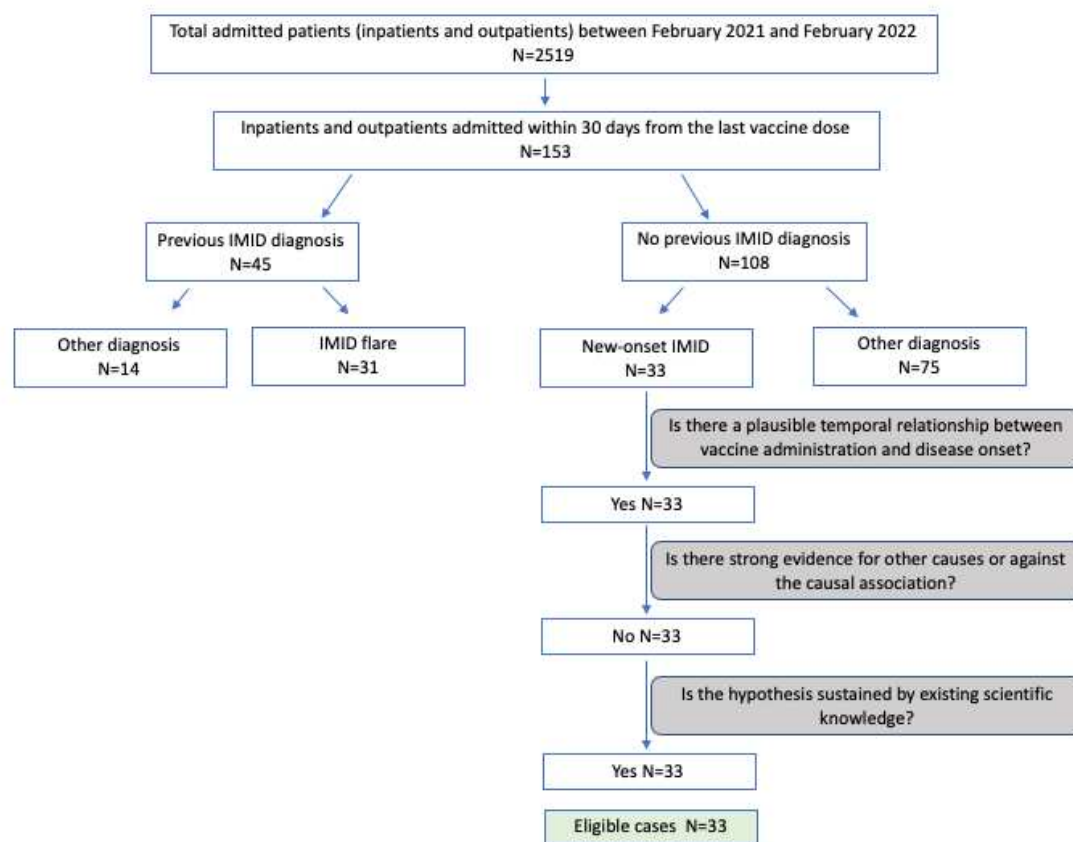

Supplementary Table S1. Timeframe of symptom onset in all patients new-onset immune mediated inflammatory diseases (IMID) and in patient subgroups according to the number of doses of vaccines received before new-onset IMID. All values are shown as number of patients (percentage)

| Time of symptom onset after the administration of vaccine dose | All patients with new-onset IMID (N=33) | Patients divided according to the vaccine doses before IMID onset, N (%) of patients |                |                              |
|----------------------------------------------------------------|-----------------------------------------|--------------------------------------------------------------------------------------|----------------|------------------------------|
|                                                                |                                         | 1 dose (N=9)                                                                         | 2 doses (N=16) | Full-schedule +booster (N=8) |
| Week 1 (day of vaccination to day 7)                           | 24 (72)                                 | 5 (55)                                                                               | 11 (69)        | 8 (100)                      |
| Week 2 (day 8 to day 14)                                       | 5 (15)                                  | 2 (22)                                                                               | 3 (19)         | 0                            |
| Week 3 (day 15 to day 21)                                      | 3 (9)                                   | 1 (11)                                                                               | 2 (12)         | 0                            |
| Week 4 (day 22 to day 30)                                      | 1 (4)                                   | 1 (11)                                                                               | 0              | 0                            |

Supplementary Table S2. Timeframe of symptom onset in all patients with immune mediated inflammatory diseases (IMID) that developed a disease flare and in patient subgroups according to the number of doses of vaccines received before IMID flare. All values are shown as number of patients (percentage)

| Time of symptom onset after the administration of vaccine dose | All patients with previous IMID that developed a disease flare (N=31) | Patients with previous IMID divided according to the vaccine doses before IMID flare, N (%) of patients |                |                             |
|----------------------------------------------------------------|-----------------------------------------------------------------------|---------------------------------------------------------------------------------------------------------|----------------|-----------------------------|
|                                                                |                                                                       | 1 dose (N=17)                                                                                           | 2 doses (N=11) | Full-schedule+booster (N=3) |
| Week 1 (day of vaccination to day 7)                           | 26 (84)                                                               | 13 (76)                                                                                                 | 10 (91)        | 3 (100)                     |
| Week 2 (day 8 to day 14)                                       | 2 (6)                                                                 | 2 (12)                                                                                                  | 0              | 0                           |
| Week 3 (day 15 to day 21)                                      | 2 (6)                                                                 | 2 (12)                                                                                                  | 0              | 0                           |
| Week 4 (day 22 to day 30)                                      | 1 (4)                                                                 | 0                                                                                                       | 1 (9)          | 0                           |
